# Supplementary material for: Facile Synthesis and Application of Ag-NPs for Controlling Antibiotic-ResistantPseudomonas spp. and Bacillus spp. in a Poultry Farm Environment
Source: Hindawi journal article supplement (doi:10.1155/2023/6260066), 2023-04-20
Supplement: f1 [file 6260066.f1.docx]

**Supplementary Information**

**Title: Facile Synthesis and Application of Ag-NPs for Controlling Antibiotic Resistance *Pseudomonas* spp. and *Bacillus* spp. at Poultry Farm Environment**

Aminur Rahman1, Harunur Rasid1, Md. Isahak Ali1, Nymul Yeachin2, Md. Shahin Alam3, Khandker Saadat Hossain2, Md. Abdul Kafi1*

1 Department of Microbiology and Hygiene, Bangladesh Agricultural University, Mymensingh-2202, Bangladesh.

2 Department of Physics, University of Dhaka, Dhaka-1000, Bangladesh.

3Animal Health Research Division (AHRD), Bangladesh Livestock Research Institute (BLRI), Shavar-1341, Bangladesh

*Corresponding Author

Md. Abdul Kafi

Professor and Head

Department of Microbiology and Hygiene

Bangladesh Agricultural University

Mymensingh-2202

**Cell no.:** +8801717007975

**Email:** [makafi2003@bau.edu.bd](mailto:makafi2003@bau.edu.bd)

Web link: <https://vmh.bau.edu.bd/pages/faculty>


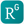
: <https://www.researchgate.net/profile/Md_Abdul_Kafi>


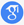
: <https://scholar.google.com/citations?user=dfdJCtQAAAAJ&hl=en>

**Biochemical test**


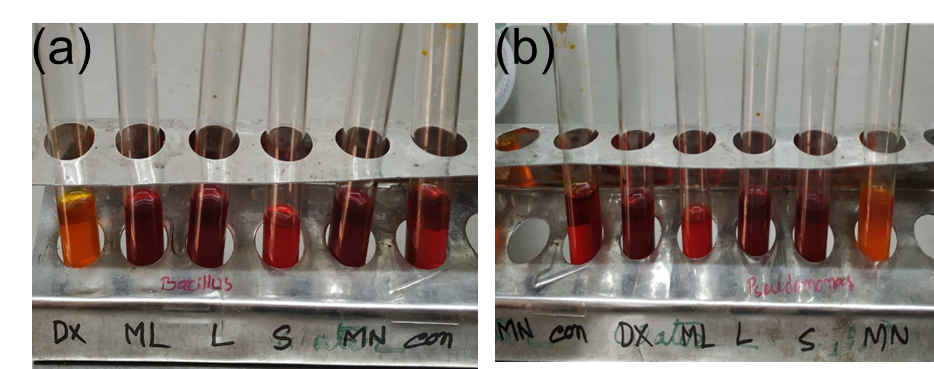
Five basic sugar fermentation test was employed for biochemical characterization of isolated bacteria and observed for fermentation and gas formation as showed in Figure S1. The colour changes along with gase formation in Dextrose, and Sucrose (except Mannitol, Lactose, Maltose and control) when incolum were prepared from Blood agar indicated Bacillus spp. as shown in Figure S1a. Whereas, no colour change with gase formation occurred in Dextrose, Maltose, Lactose and Sucrose except Mannitol when inoculum was taken from MacConkey agar indicating Pseudomonas spp. as shown in Figure S1b.

Figure S1. Optical image showing sugar fermentation test of a) *Bacillus* spp.and b) *Pseudomonas* spp.

**Table- S1** Comparative analysis of Ag-NPs synthesis with previously synthesized antibacterial Ag-NPs

| Sl.No. | Use of reducing agents | Use of capping agents | Source of bacteria investigated | Name of organism | Doses µg/ml | | Zone of inhibition (mm) | References |
| --- | --- | --- | --- | --- | --- | --- | --- | --- |
| MIC | MBC |
| 1 | *Pseudomonas aeruginosa* | 0.2 M NaOH and 0.1 M HCl | Human | *E. coli* | 100 | 150 | 18±0.18 | [1] |
| *Klebsiella pneumoniae* | 100 | 150 | 19±0.14 |
| *Pseudomonas aeruginosa* | 100 | 150 | 19±0.25 |
| 2 | *Raoultella Planticola* | Without | Human hospitals | *Shigella* spp. | 10 | 20 | N/A | [2] |
| *Staphylococcus aureus* | 10 | 20 | N/A |
| *Bacillus* cereus | 10 | 20 | N/A |
| *Salmonella* spp. | 30 | 50 | N/A |
| 4 | Punica granatum | Without | Unknown | *E. coli* | N/A | N/A | 8.51+0.48 | [3] |
| *Bacillus subtilise* | N/A | N/A | 4.42+0.32 |
| 5 | AgNO3 and Polyvinyl Pyrrolidone (PVP) | Without | Unknown | *Kocuria varians* | N/A | N/A | Didn't have antibacterial activity | [4] |
| 6 | polyvinylpyrrolidone (PVP) | branched polyethyleneimine (BPEI) | Unknown | *E. coli* | N/A | N/A | Undefined | [5] |
| *Pseudomonas aeruginosa* | N/A | N/A | Undefined |
| 7 | Sodium tripolyphosphate | Without | Poultry Farm | *Bacillus* spp. | 1.06 | 2.1 | 19±0.4 | This study |
| *Pseudomonas* spp. | 4.2 | 8.5 | 17±0.38 |

Reference

1. Abeer Mohammed AB, Abd Elhamid MM, Khalil MKM, Ali AS, Abbas RN. The potential activity of biosynthesized silver nanoparticles of Pseudomonas aeruginosa as an antibacterial agent against multidrug-resistant isolates from intensive care unit and anticancer agent. Environ Sci Eur [Internet]. Springer Berlin Heidelberg; 2022;34:1–15. Available from: https://doi.org/10.1186/s12302-022-00684-2

2. Qurbani K, Hussein S, Hamzah H, Sulaiman S, Pirot R, Motevaseli E, et al. Synthesis of Silver Nanoparticles by Raoultella Planticola and Their Potential Antibacterial Activity Against Multidrug-Resistant Isolates. Iran J Biotechnol. 2022;20:75–83.

3. Kanwal Z, Raza MA, Riaz S, Manzoor S, Tayyeb A, Sajid I, et al. Synthesis and characterization of silver nanoparticle-decorated cobalt nanocomposites (Co@AgNPs) and their density-dependent antibacterial activity. R Soc Open Sci. 2019;6.

4. Gloria EC, Ederley V, Gladis M, César H, Jaime O, Oscar A, et al. Synthesis of Silver nanoparticles (AgNPs) with Antibacterial Activity. J Phys Conf Ser. 2017;850.

5. Bilek O, Fialova T, Otahal A, Adam V, Smerkova K, Fohlerova Z. Antibacterial activity of AgNPs-TiO2nanotubes: influence of different nanoparticle stabilizers. RSC Adv. 2020;10:44601–10.
